# Supplementary material for: Selective separation of uranyl ions from some lanthanide elements using a promising β-enaminoester ligand by cloud point extraction
Source: Royal Society of Chemistry journal article supplement (doi:10.1039/d2ra00274d), 2022-01-01
Supplement: d2ra00274d1.pdf [file d2ra00274d1.pdf]

# Selective separation of uranyl ions from some lanthanide elements using a promising $\beta$ -enaminoester ligand by cloud point extraction

A. B. Abdallah<sup>\*a</sup>, Adel M. Youins<sup>a</sup>, Mohamed R. El-Kholany<sup>a</sup>

<sup>a</sup>Department of Chemistry, Faculty of Science, Mansoura University, El-Gomhoria Street, Mansoura-35516, Egypt

\*E-mail: [ahmed.bahgat@mans.edu.eg](mailto:ahmed.bahgat@mans.edu.eg)

## Supplementary Material

### Figure Caption

**Figure. S1.** The geometry forms of cyclic  $\beta$ -enaminones

**Figure. S2.** IR for the  $\beta$ -enaminoester ligand.

**Figure. S3.** <sup>1</sup>H-NMR for the  $\beta$ -enaminoester ligand.

**Figure. S4.** ESI-MS for the  $\beta$ -enaminoester ligand.

**Figure S5.** Optimized geometries of the ligand and its  $\text{UO}_2^{2+}$  complex

**Figure. S6.** Effect of Triton X-114 on the complex formation between uranyl ions and enaminoester.

Optimized conditions: volume of sample, 50 mL; pH, 4.5;  $\text{UO}_2^{2+}$ , 100 ng mL<sup>-1</sup>; KI, 0.1 mol L<sup>-1</sup>; Enaminoester,  $5.0 \times 10^{-3}$  mol L<sup>-1</sup>.

**Figure. S7.** Effect of enantiomer concentration on the uranyl extraction by the CPE. Optimized conditions: volume of sample, 50 mL; pH, 4.5;  $\text{UO}_2^{2+}$ , 100 ng mL<sup>-1</sup>; KI, 0.1 mol L<sup>-1</sup>; Triton X-114,  $5.0 \times 10^{-4}$  mol L<sup>-1</sup>.

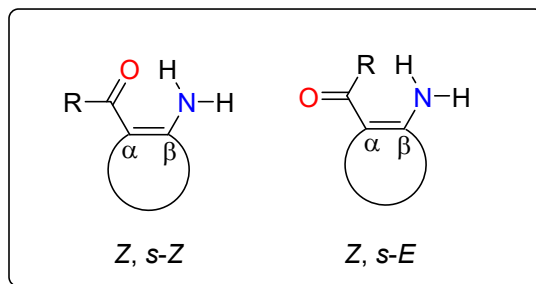

**Figure. S1**

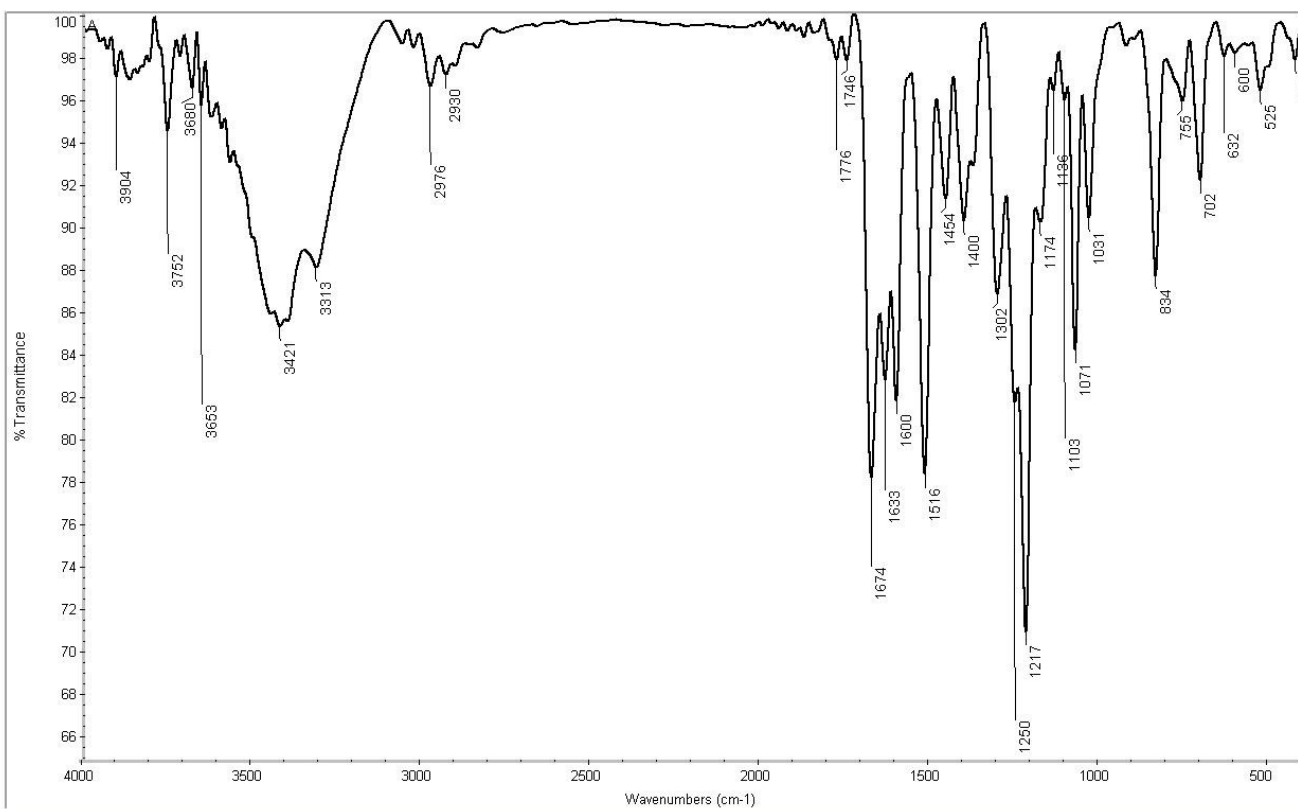

**Figure. S2**

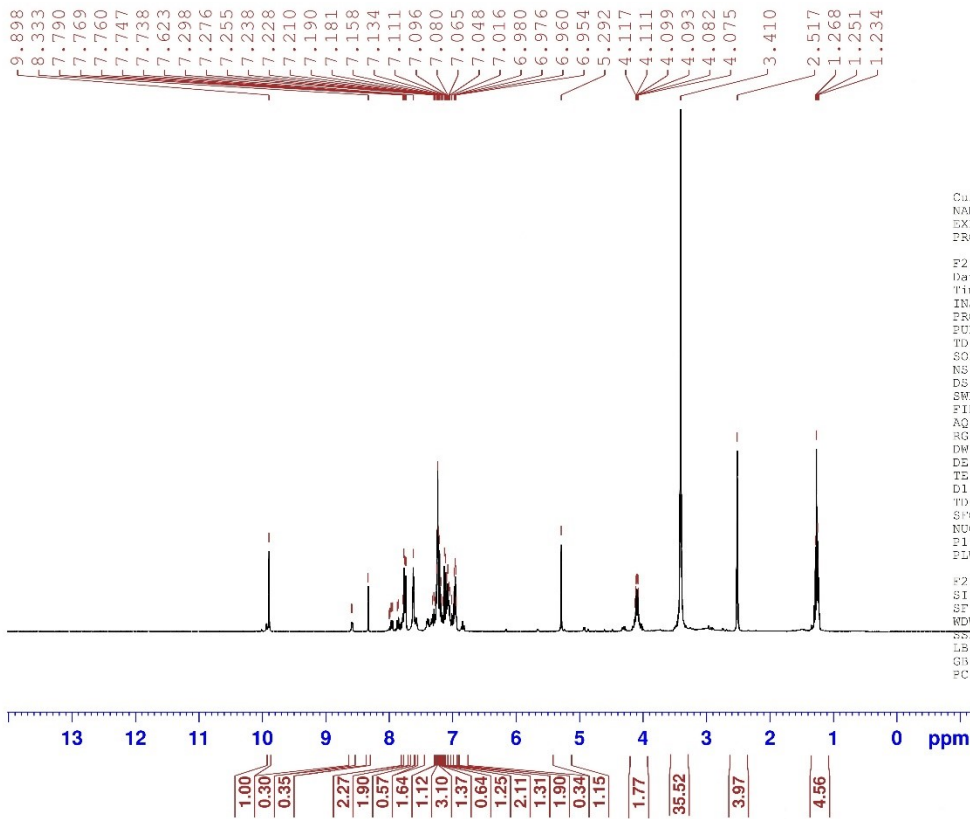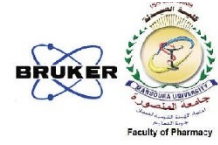

Current Data Parameters  
 NAME: Ahmed Bahgat-28A3-2-W11-protor  
 EXPNO: 10  
 PROCNO: 1

F2 - Acquisition Parameters  
 Date\_: 20200613  
 Time: 10.31 h  
 INSTRUM: spect  
 PROBHD: Z1C0618\_0945 ( )  
 PULPROG: zg30  
 TD: 65536  
 SOLVENT: DMSO  
 NS: 16  
 DS: 2  
 SMC: 8012.820 Hz  
 FIDRES: 0.244532 Hz  
 AQ: 4.0894463 sec  
 RG: 112.56  
 DM: 62.400 usec  
 DE: 6.50 usec  
 TE: 291.7 K  
 D1: 1.00000000 sec  
 FOC: 400.2024712 MHz  
 NUC1: 1H  
 P1: 13.50 usec  
 PLW1: 13.00000000 W

F2 - Processing parameters  
 SI: 65536  
 SF: 400.2000000 MHz  
 RDW: EM  
 SSB: 0  
 LB: 0.30 Hz  
 GB: 0  
 PC: 1.00

Figure. S3

Data Express Report

TIC Filtered Filtered  
 28\_Scan1\_is1 2020.08.30 13:00:24 ;  
 Intensity ESI +

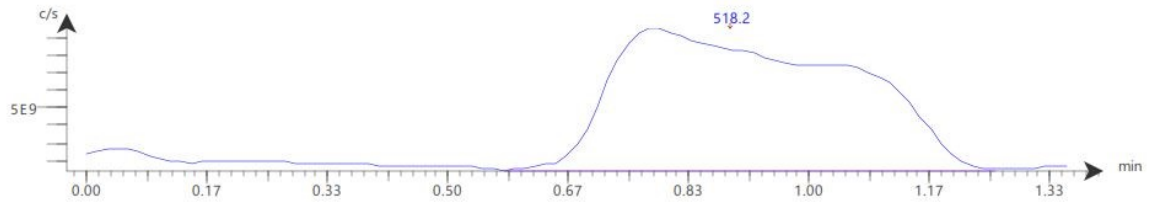

| Time (Peak Maximum M:S/Minutes) | Maximum Intensity (c/s) | Time (Peak Centroid M:S/Minutes) | Peak Area | % Peak Area | Peak Resolution | Base Peak Mass (m/z) | Label |
|---------------------------------|-------------------------|----------------------------------|-----------|-------------|-----------------|----------------------|-------|
| 0.04                            | 4.498E8                 | 0.04                             | 1.941E9   | 1.1         | 4.2             | 299.9                |       |
| 0.20                            | 1.087E8                 | 0.21                             | 8.748E8   | 0.5         | 5.7             | 300.0                |       |
| 0.49                            | 1.437E8                 | 0.48                             | 7.045E8   | 0.4         | 9.5             | 487.4                |       |
| 0.78                            | 8.111E9                 | 0.89                             | 1.801E11  | 98.1        | 25.3            | 518.2                |       |

Figure. S4

A

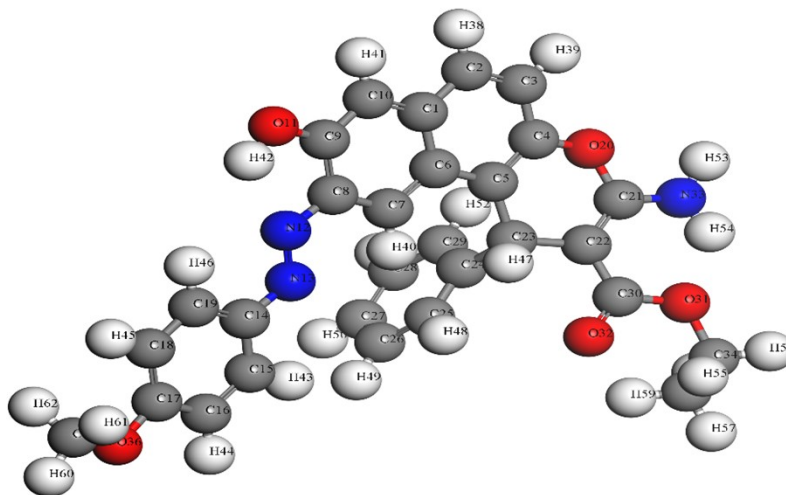

B

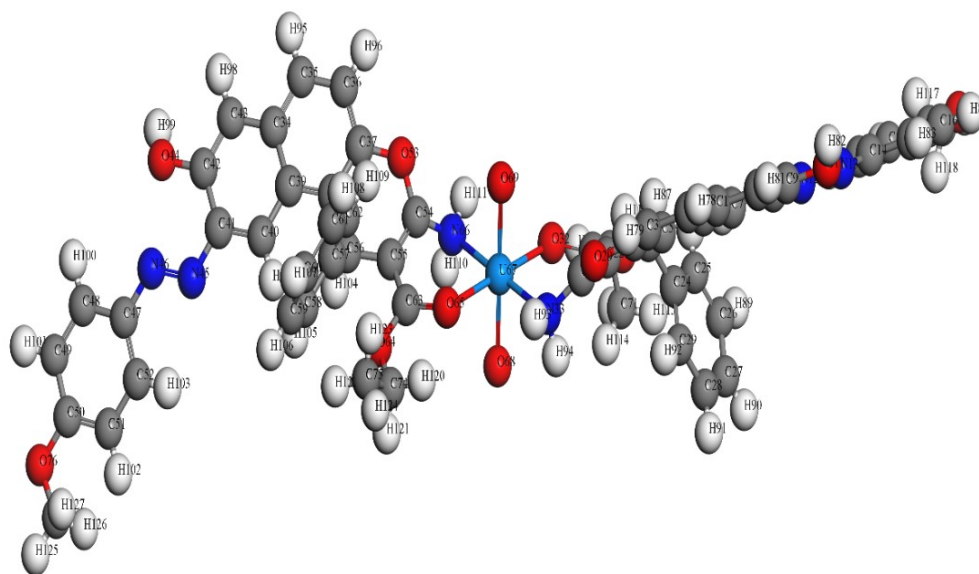

Figure. S5

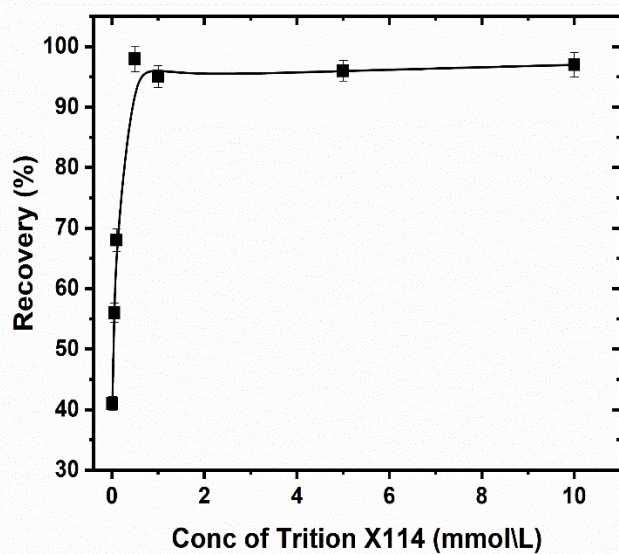

**Figure. S6**

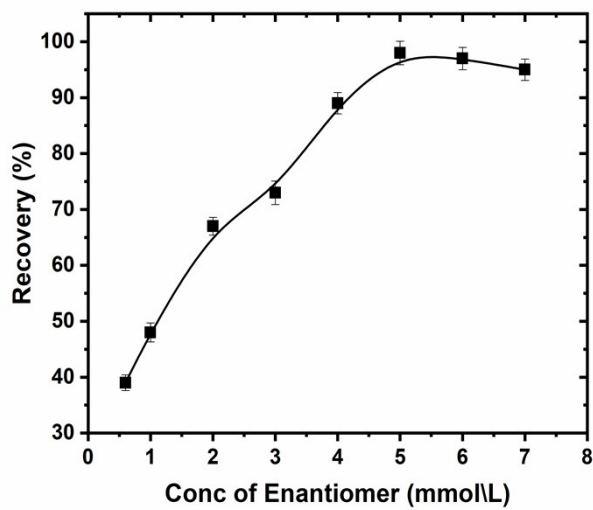

**Figure. S7**

## Table Caption

**Table. S1.** Instrumental parameters for uranyl determination using ICP-OES.

**Table S2:** Selected bond lengths and bond angles for the ligand and its complex.

**Table S3.** The analytical performance of the proposed CPE method

**Table. S1.**

| Parameter                                         | Range |
|---------------------------------------------------|-------|
| RF power (W)                                      | 1200  |
| Flow rate of plasma gas (L min <sup>-1</sup> )    | 12    |
| Flow rate of auxiliary gas (L min <sup>-1</sup> ) | 1     |
| Flow rate of nebulizer gas (L min <sup>-1</sup> ) | 0.7   |

**Table S2**

| Compound                                   | Bond lengths (Å)                 |      | Bond angles (°)                                   |        |
|--------------------------------------------|----------------------------------|------|---------------------------------------------------|--------|
| <b>Enaminoester ligand</b>                 | C <sup>30</sup> -O <sup>31</sup> | 1.42 | O <sup>32</sup> -C <sup>30</sup> -C <sup>22</sup> | 124.14 |
|                                            | C <sup>30</sup> -O <sup>32</sup> | 1.27 | N <sup>33</sup> -C <sup>21</sup> -C <sup>22</sup> | 127.98 |
|                                            | C <sup>21</sup> -N <sup>33</sup> | 1.37 |                                                   |        |
| <b>UO<sub>2</sub><sup>2+</sup> complex</b> | C <sup>30</sup> -O <sup>31</sup> | 1.51 | O <sup>32</sup> -C <sup>30</sup> -C <sup>22</sup> | 124.56 |
|                                            | C <sup>30</sup> -O <sup>32</sup> | 1.52 | N <sup>33</sup> -C <sup>21</sup> -C <sup>22</sup> | 123.66 |
|                                            | C <sup>21</sup> -N <sup>33</sup> | 1.52 |                                                   |        |
|                                            | O <sup>32</sup> -U <sup>67</sup> | 2.46 | O <sup>69</sup> -U <sup>67</sup> -O <sup>68</sup> | 179.76 |
|                                            | N <sup>33</sup> -U <sup>67</sup> | 2.47 | N <sup>33</sup> -U <sup>67</sup> -O <sup>32</sup> | 87.890 |
|                                            | O <sup>65</sup> -U <sup>67</sup> | 2.47 | N <sup>66</sup> -U <sup>67</sup> -O <sup>65</sup> | 88.430 |
|                                            | N <sup>66</sup> -U <sup>67</sup> | 2.47 | N <sup>66</sup> -U <sup>67</sup> -O <sup>32</sup> | 91.690 |
|                                            | U <sup>67</sup> -O <sup>69</sup> | 2.48 | O <sup>65</sup> -U <sup>67</sup> -N <sup>33</sup> | 91.990 |
|                                            | U <sup>67</sup> -O <sup>68</sup> | 2.48 | N <sup>66</sup> -U <sup>67</sup> -N <sup>33</sup> | 179.52 |
|                                            |                                  |      | O <sup>65</sup> -U <sup>67</sup> -O <sup>32</sup> | 178.86 |

**Table S3.**

| <b>Parameter</b>    | <b>Value</b>                                     |
|---------------------|--------------------------------------------------|
| Concentration range | 3 ng mL <sup>-1</sup> to 250 ng mL <sup>-1</sup> |
| LOD                 | 0.5 ng mL <sup>-1</sup>                          |
| LOQ                 | 1.6 ng mL <sup>-1</sup>                          |
| Reproducibility     | 2.4% (RSD)                                       |
| Repeatability       | 1.9 (RSD)                                        |
