# Supplementary figures and images for: Selective separation of uranyl ions from some lanthanide elements using a promising β-enaminoester ligand by cloud point extraction
Source: Royal Society of Chemistry journal article supplement (doi:10.1039/d2ra00274d), 2022-01-01

## Graphical abstract

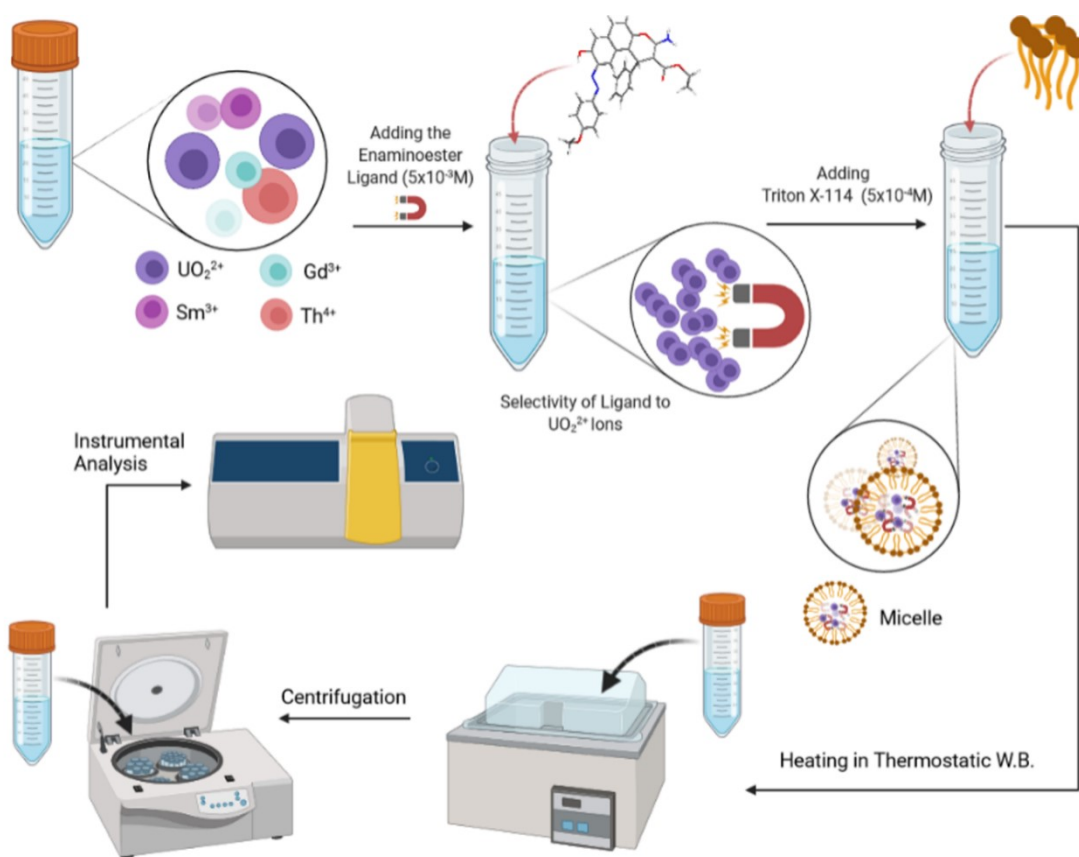

Supplement: d2ra00274d2.pdf [file d2ra00274d2.pdf]
